# Supplementary material for: Insulin-like growth factor-independent insulin-like growth factor binding protein 3 promotes cell migration and lymph node metastasis of oral squamous cell carcinoma cells by requirement of integrin β1
Source: PubMed Central journal article supplement (PMC4747192; doi:10.18632/oncotarget.5995), 2015-10-19
Supplement: oncotarget-06-41837-s001.pdf [file oncotarget-06-41837-s001.pdf]

## SUPPLEMENTARY TABLES AND FIGURES

**Supplementary Table S1: Short tandem repeat (STR) profiles of three oral squamous cell carcinoma (OSCC) cell lines**

| Markers (bp/<br>peak number) | OEC-M1    |           | LN1-1     |           | LN1-2     |           |
|------------------------------|-----------|-----------|-----------|-----------|-----------|-----------|
| TH01                         | 194.31/9  |           | 194.41/9  |           | 194.32/9  |           |
| CSF1PO                       | 313.68/12 |           | 313.66/12 |           | 313.67/12 |           |
| D13S317                      | 185.08/10 |           | 185.23/10 |           | 185.09/10 |           |
| D16S539                      | 279.29/10 | 287.24/12 | 279.47/10 | 287.73/12 | 279.34/10 | 287.28/12 |
| VWA                          | 136.87/14 | 145.89/16 | 137.07/14 | 146.16/16 | 136.80/14 | 145.94/16 |
| TPOX                         | 229.45/8  |           | 229.49/8  |           | 229.42/8  |           |
| D5S818                       | 131.59/11 |           | 131.52/11 |           | 131.59/11 |           |
| D7S820                       | 221.64/8  | 233.49/11 | 221.82/8  | 233.73/11 | 221.74/8  | 233.57/11 |
| D3S1358                      | 123.33/15 | 135.73/18 | 123.38/15 | 135.74/18 | 123.35/15 | 135.69/18 |
| Amel                         | 211.05/X  | 216.53/Y  | 210.92/X  | 216.52/Y  | 211.06/X  | 216.58/Y  |

**Supplementary Table S2: Correlations between clinical parameters and relative IGFBP3 mRNA and cancerous IGFBP3 protein in oral squamous cell carcinoma (OSCC) patients<sup>#</sup>**

| Clinical features       | Case no | Relative IGFBP3 mRNA | <i>p</i> -value | Case no | Cancerous protein score | <i>p</i> -value |
|-------------------------|---------|----------------------|-----------------|---------|-------------------------|-----------------|
| TNM stage               | 15      | 2.259 ± 0.496        | 0.0737          | 27      | 1.889 ± 0.1343          | 0.6903          |
| Stage I-II              | 25      | 4.491 ± 0.8878       |                 | 60      | 1.817 ± 0.1049          |                 |
| Stage III-IV            |         |                      |                 |         |                         |                 |
| T classification        | 23      | 2.726 ± 0.5599       | 0.0739          | 44      | 1.773 ± 0.117           | 0.4228          |
| T1-2                    | 17      | 4.910 ± 1.16         |                 | 43      | 1.907 ± 0.1191          |                 |
| T3-4                    |         |                      |                 |         |                         |                 |
| N classification        | 23      | 2.508 ± 0.5148       | 0.0256*         | 51      | 1.922 ± 0.108           | 0.24            |
| N = 0                   | 17      | 5.205 ± 1.16         |                 | 36      | 1.722 ± 0.13            |                 |
| N = 1-2                 |         |                      |                 |         |                         |                 |
| Lymphovascular invasion | 21      | 2.706 ± 0.5559       | 0.0703          | 47      | 1.809 ± 0.1123          | 0.5083          |
| No                      | 18      | 4.936 ± 1.119        |                 | 38      | 1.921 ± 0.1272          |                 |
| Yes                     |         |                      |                 |         |                         |                 |

<sup>#</sup>all of these 40 patients were male patients without any evidence of distant metastasis disease prior to surgery (M0). None of them had N3 disease.

\**p* < 0.05 by student *t* test

**A**

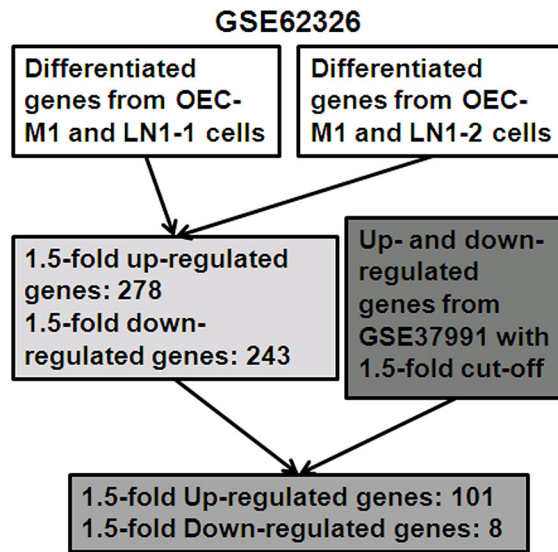

**B**

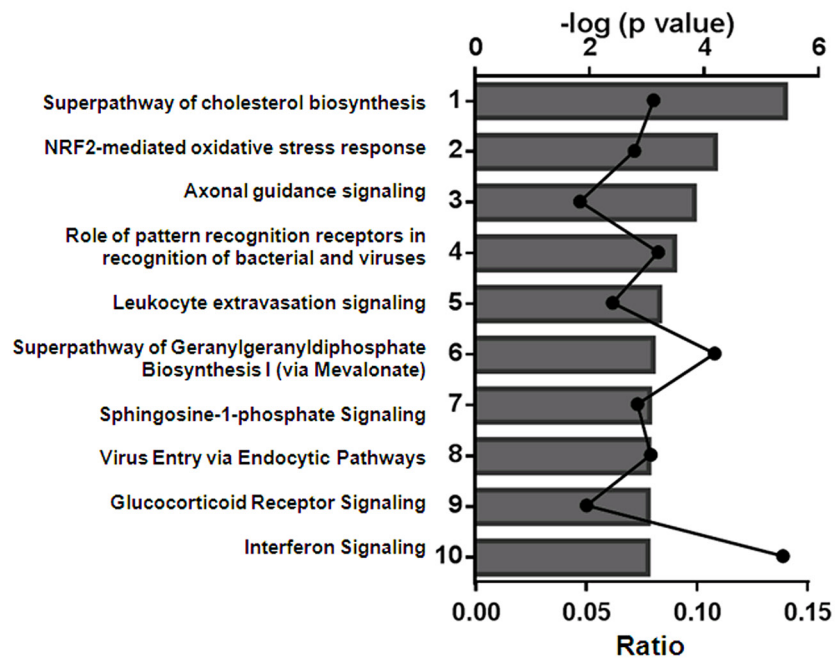

**Supplementary Figure S1: Microarray analysis of de-regulated genes among the three OSCC cells.** A. The scheme shows the data process after microarray analysis. B. Significant canonical pathways were ranked by negative log of the calculated hypergeometric  $p$  value. The curve represented the ratio of genes in the pathways.

**A**

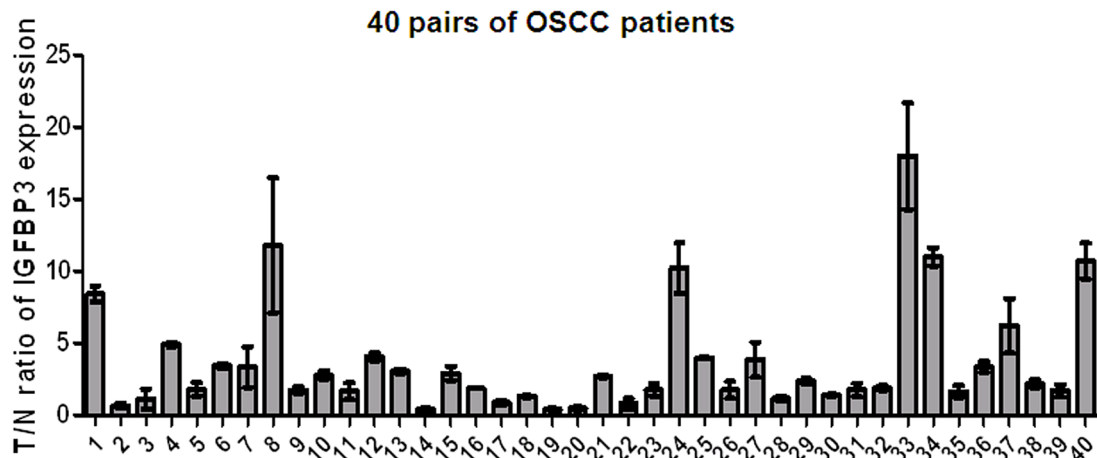

**B**

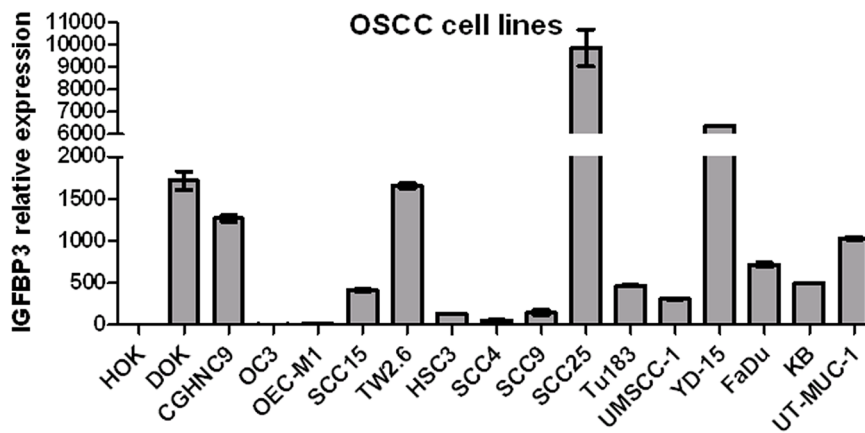

**Supplementary Figure S2: Expression of IGFBP3 mRNA in OSCC tissues and cell lines.** **A.** The data revealed significant up-regulation of IGFBP3 mRNA in 30/40 (75%) OSCC tissues, with 1.5-fold increase than the corresponding nontumorous tissues. The relative IGFBP3 expression was determined by dividing the detected signal from a tumorous tissue by that from its corresponding nontumorous tissues. The data were shown by averaging two different probes from the dataset GSE37991. **B.** The levels of IGFBP3 mRNA in 16 OSCC cell lines were analyzed by qRT-PCR. All amplifications were normalized to an endogenous  $\beta$ -actin control. The relative expression of IGFBP3 mRNA in OSCC cells was normalized to that in human oral keratinocytes (HOK) cells.

**A**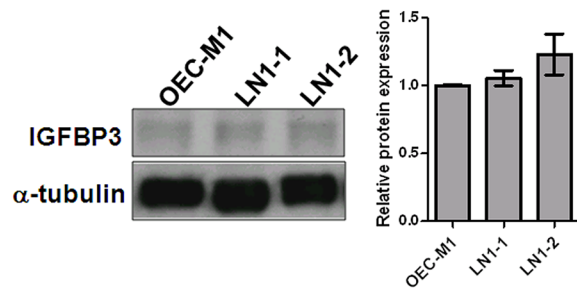**B**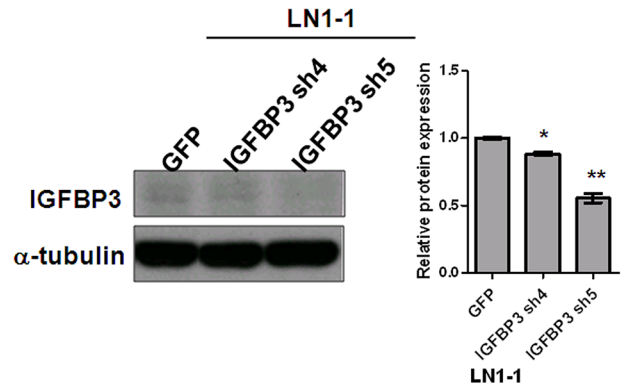

**Supplementary Figure S3: Detection of IGFBP3 protein by immunoblot assay.** **A.** Immunoblot analysis of IGFBP3 protein in OEC-M1, LN1-1 and LN1-2 cells.  $\alpha$ -tubulin serves as an internal control. Ratios were determined by dividing the normalized protein levels in sublines with that in OEC-M1 cells. **B.** Immunoblot analysis of IGFBP3 protein in LN1-1 cells with IGFBP3 knockdown (IGFBP3 sh4 and sh5) and the corresponding controls (pLKO-GFP). Ratios were determined by dividing the normalized protein levels in LN1-1 IGFBP3 sh4 and sh5 cells with that in LN1-1 pLKO-GFP cells. Bar, SE; \* $p < 0.05$ ; \*\* $p < 0.01$ .

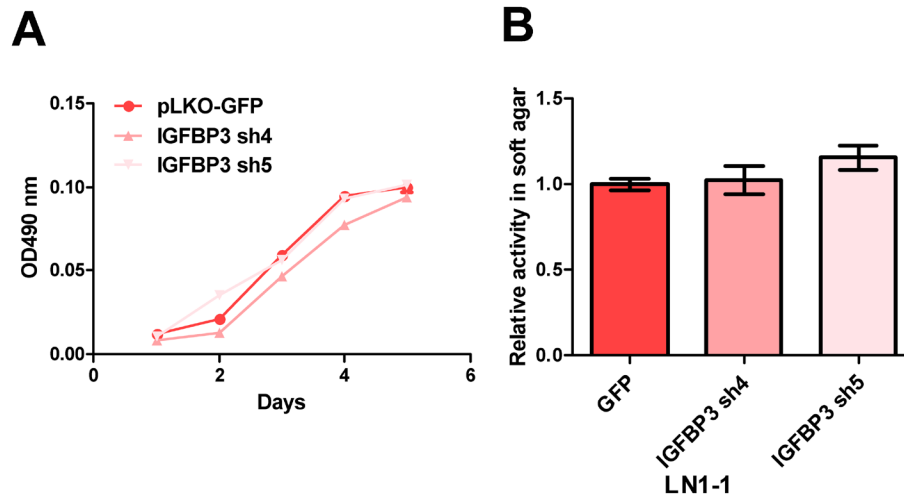

**Supplementary Figure S4: Knockdown of IGFBP3 has no effects on cell proliferation and anchorage-independent growth.** **A.** Representative data show cell proliferation in LN1-1 cells with IGFBP3 knockdown (IGFBP3 sh4 and sh5) and their corresponding control cells (pLKO-GFP). **B.** Representative data demonstrate anchorage-independent growth activity for LN1-1 pLKO-GFP, IGFBP3 sh4 and sh5 cells. The relative activity was determined by normalizing the mean of colonies/per plate in LN1-1 IGFBP3 sh4 and sh5 to that in LN1-1 pLKO-GFP cells. Bar, SE.

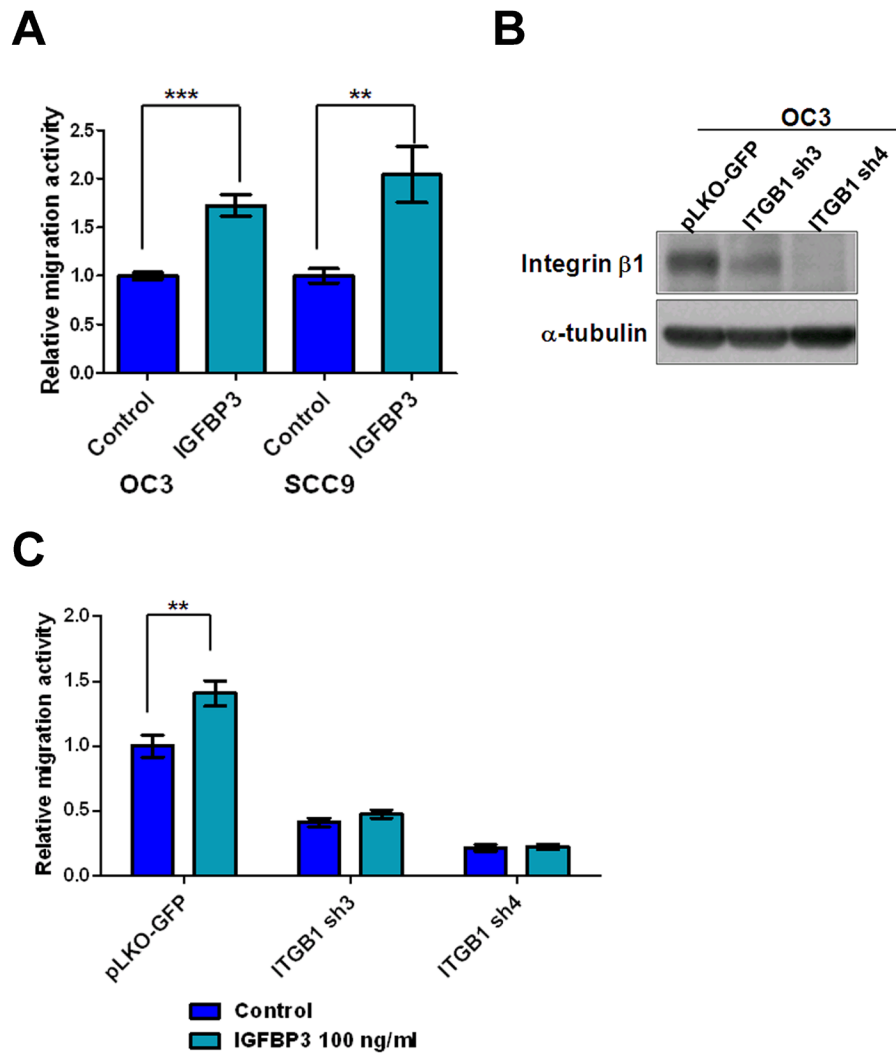

**Supplementary Figure S5: Intergrin  $\beta$ 1 is required for IGFBP3-induced migration in OC3 cells.** **A.** Representative data show the relative migration activity of OC3 and SCC9 cells treated with recombinant IGFBP3. The relative migration activity was defined by normalizing the mean of migrated cells/per field in IGFBP3-treated cells with that in the untreated cells. **B.** Immunoblot analysis of integrin  $\beta$ 1 protein in OC3 cells with ITGB1 shRNA expression (OC3 ITGB1 sh3 and sh4) and vector controls (OC3 pLKO-GFP).  $\alpha$ -tubulin serves as an internal control. **C.** Representative data shows the relative migration activity of OC3 pLKO-GFP, ITGB1 sh3 and sh4 cells upon 100 ng/ml IGFBP3 treatment. The relative migration activity was defined by normalizing the mean of migrated cell /per field in OC3 pLKO-GFP cells treated with IGFBP3 and OC3 ITGB1 sh3 and sh4 with/without IGFBP3 treatment with that in untreated OC3 pLKO-GFP cells. Bar, SE; \*\* $p < 0.01$ ; \*\*\* $p < 0.001$ .

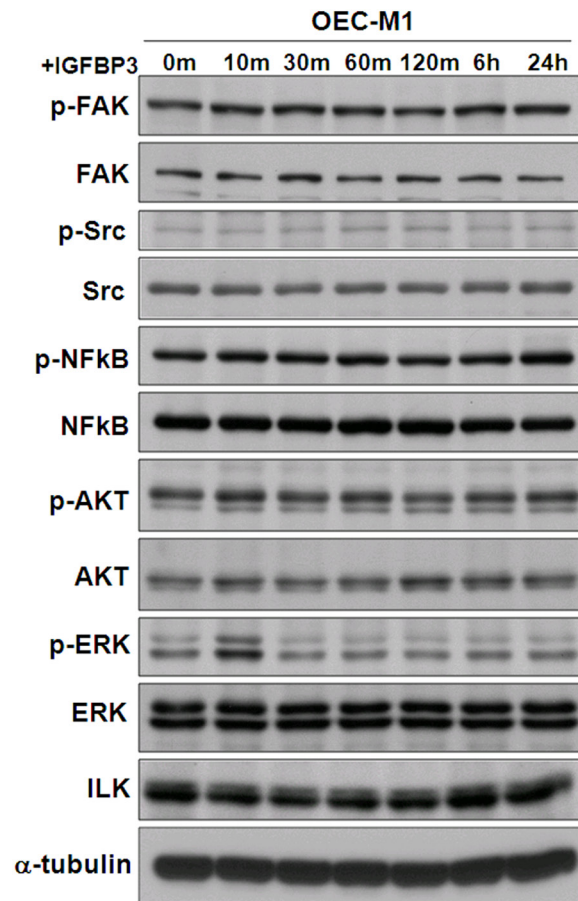

**Supplementary Figure S6: Detection of ERK activation by IGF1BP3 stimulation in OEC-M1 cells.** Immunoblot assay demonstrated total and phosphorylated FAK/Src/NFkB/AKT/ERK and total ILK in OEC-M1 cells upon 100 ng/ml of IGF1BP3 treatment at 10, 30, 60, 120 minutes, 6 and 24 hours.  $\alpha$ -tubulin served as internal control for ILK expression.



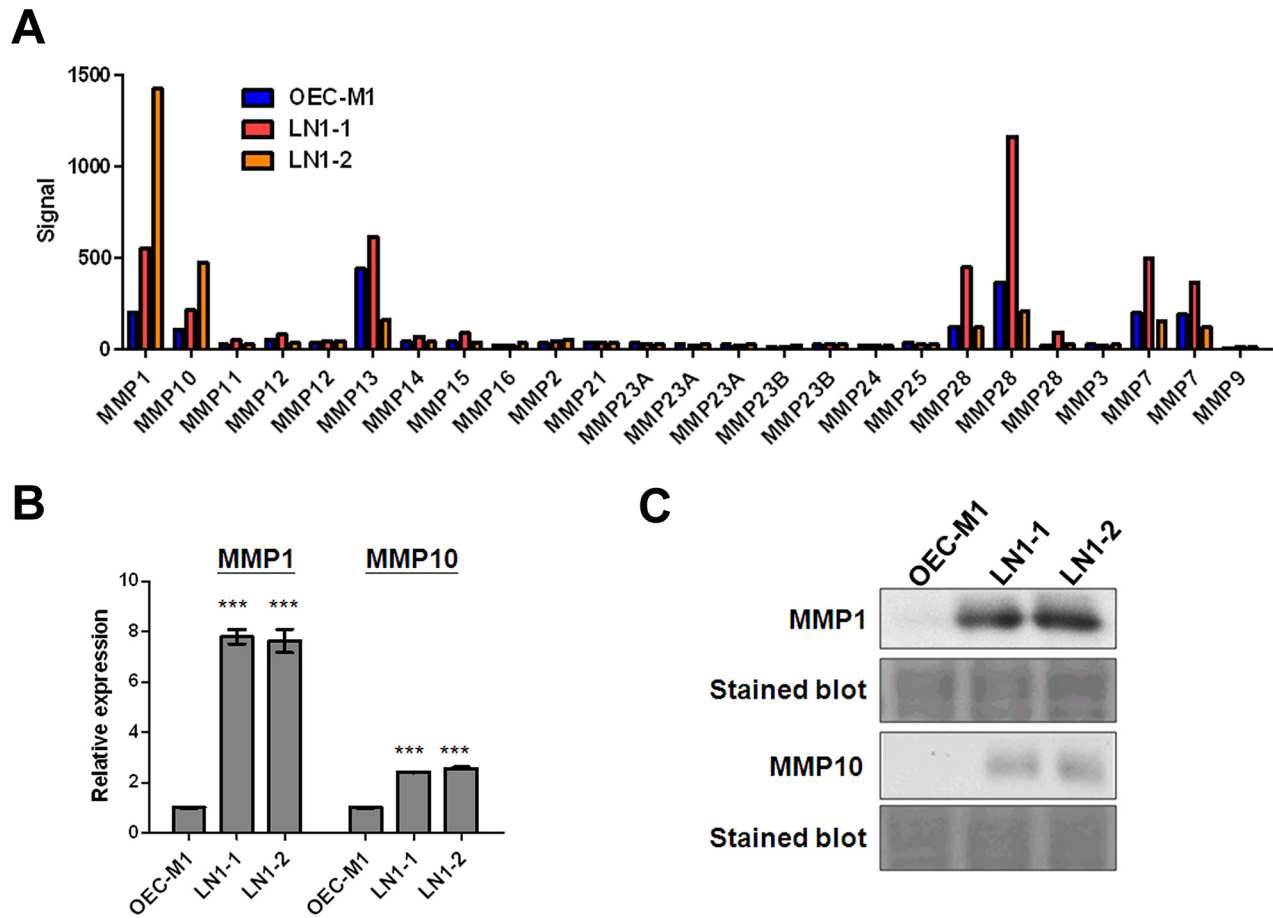

**Supplementary Figure S7: Detection of MMP1 and MMP10 expression in OEC-M1, LN1-1 and LN1-2 cells.** A. the signals of MMP-related gene expression were detected in OEC-M1, LN1-1 and LN1-2 cells by microarray analysis. B. Levels of MMP1 and MMP10 mRNA in OEC-M1, LN1-1 and LN1-2 cells were analyzed by qRT-PCR. All amplifications were normalized to an endogenous  $\beta$ -actin control. The relative expression of MMP mRNA in LN1-1 and -2 cells was normalized to that in OEC-M1 cells. C. Levels of MMP1 and MMP10 proteins in culture supernatant of OEC-M1, LN1-1 and LN1-2 cells were detected by Western blot. The stained blot served as protein loading controls. Bar, SE; \*\*\* $p$ <0.001.

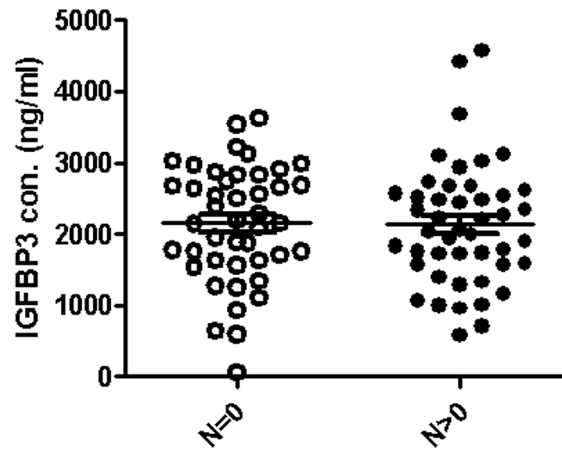

**Supplementary Figure S8:** Levels of IGFBP3 protein in plasma of OSCC patients were detected by ELISA. Levels of IGFBP3 protein did not show significant changes in plasma of OSCC patients with ( $n = 46$ ) or without ( $n = 46$ ) lymph node metastasis. Bar, SE
